# Supplementary material for: Cooperation between SAGA and SWI/SNF complexes is required for efficient transcriptional responses regulated by the yeast MAPK Slt2
Source: PubMed Central journal article supplement — Nucleic Acids Res. 2016 Apr 25;44(15):7159–72. doi: 10.1093/nar/gkw324 (PMC5009723; doi:10.1093/nar/gkw324), 2016-04-25
Supplement: supp_gkw324_nar-00840-x-2016-File011.pdf [file supp_gkw324_nar-00840-x-2016-File011.pdf]

# Supplementary data Figure S1

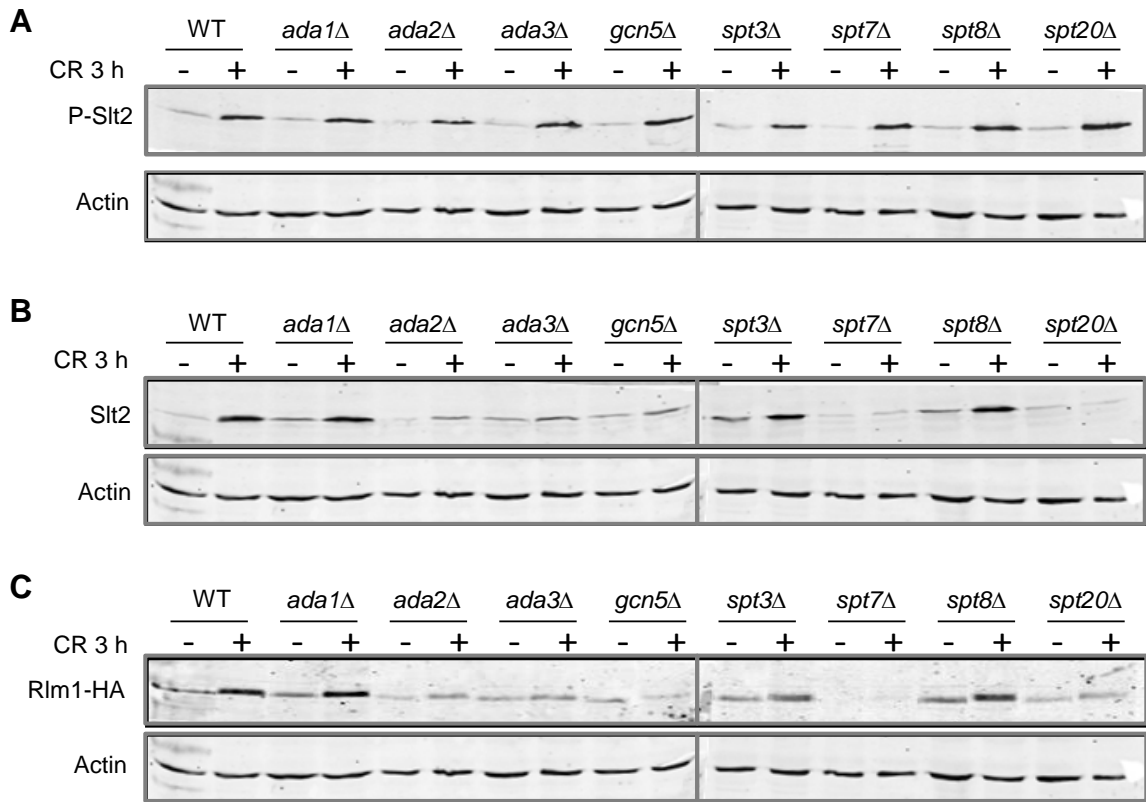

**Figure S1. Activation of the CWI pathway in several mutants of the SAGA complex. (A)** Slt2 activation was analyzed by western blotting using anti-phospho-p44/42 MAPK Ab (Thr202/Tyr204; Cell Signalling Technology, Beverly, MA) in WT and in the indicated *saga* mutants exposed to CR during 3 hours. **(B)** Total Slt2 protein was analyzed using an anti-Slt2 mAb (E-9 clone, Santa Cruz Biotechnology, Inc.), in the same strains and conditions. **(C)** Levels of Rlm1 were analyzed in WT and indicated *saga* mutants expressing Rlm1-HA from a centromeric plasmid (pRS416-RLM1HA) after CR treatment (3 hours), using an anti-HA mAb (HA.11 16B12 clone Covance Research Products, Inc.). The protein load was monitored using a mouse anti-actin mAb C4 (ICN Biomedicals, Aurora, OH).

## Supplementary data Figure S2

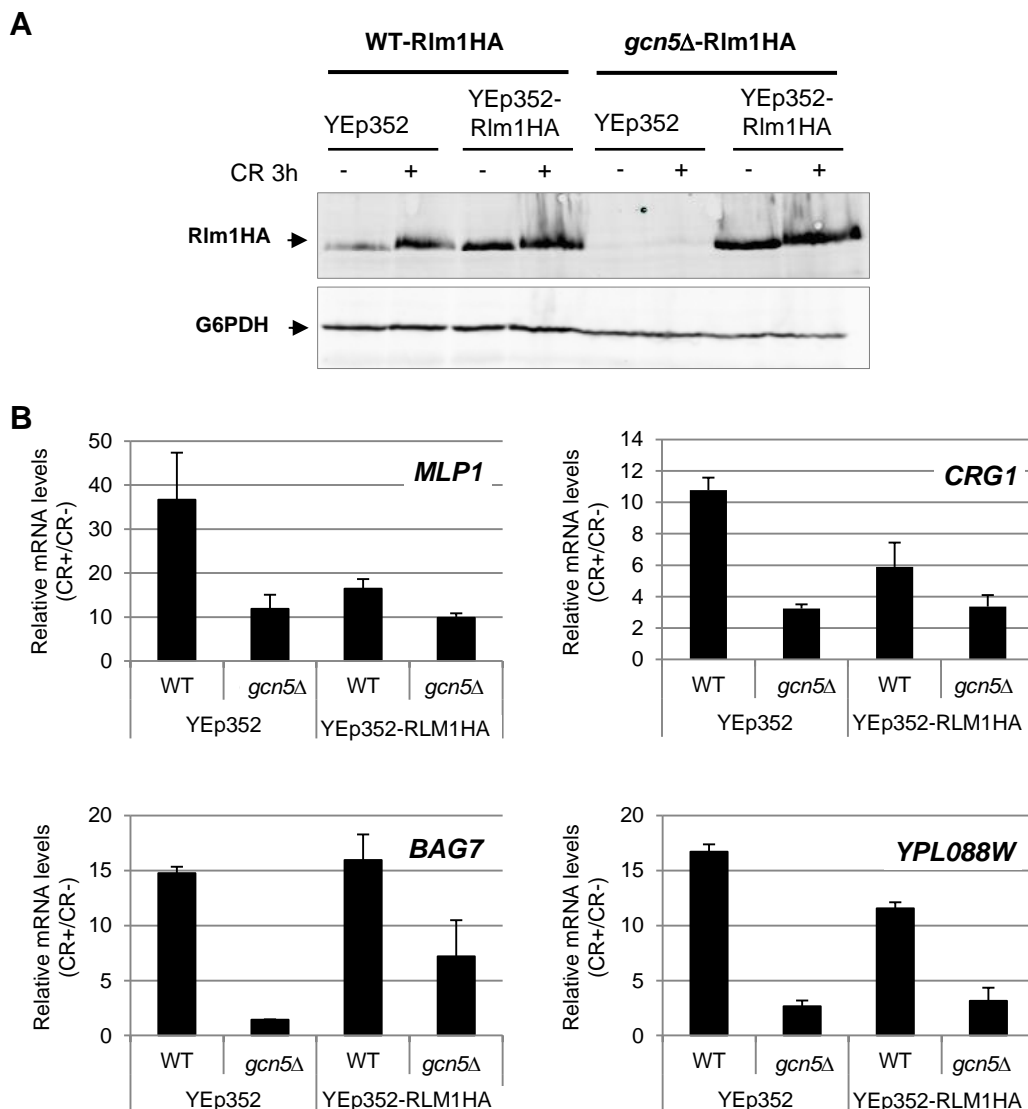

**Figure S2: Rlm1 overexpression does not suppress the transcriptional defects of a *gcn5Δ* mutant.** (A) Expression of Rlm1-HA under the control of native *RLM1* promoter from an episomal plasmid restores levels of Rlm1 similar to those found in a WT strain both under basal and stress conditions. WT and *gcn5Δ* strains expressing the Rlm1-HA tagged protein were transformed with YEp352-RLM1HA and the corresponding empty vector YEp352 and exposed to cell wall stress (CR 30  $\mu$ g/ml, 3 hours). The amount of Rlm1-HA was determined by western blotting using an anti-HA mAb. Protein load was monitored using an anti-G6PDH Ab. (B) Overexpression of Rlm1 in a *gcn5Δ* mutant strain does not restore levels of transcriptional induction of CWI-responsive genes of a WT strain under cell wall stress conditions. mRNA levels of *MLP1*, *CRG1*, *BAG7* and *YPL088W* were analyzed by RT-qPCR in WT and *gcn5Δ* cells transformed with YEp352-RLM1HA or YEp352 and subjected or not to cell wall stress (CR 30  $\mu$ g/ml, 3 hours). Levels of mRNA are expressed relative to the *ACT1* control, representing the ratio between CR-treated and non-treated cells. Data represent the mean and standard deviation of at least three independent experiments.

# Supplementary data Figure S3

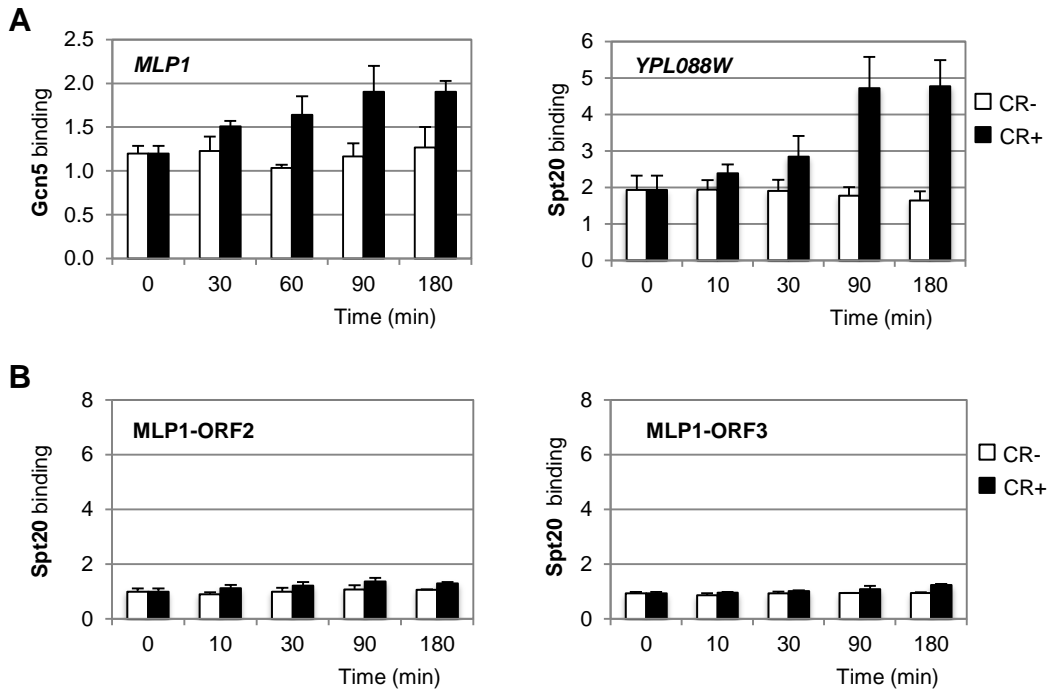

**Figure S3: SAGA complex binds to *MLP1* and *YPL088W* promoters but not to *MLP1* coding regions after CR treatment . (A)** The recruitment of Gcn5 (left panel) and Spt20 (right panel) was analyzed by CHIP in WT strains expressing Gcn5-myc and Spt20-myc, at *MLP1*-BOX1 and *YPL088W*-BOX1 regions respectively, in the absence and presence of CR at the indicated times. **(B)** Recruitment of Spt20 was determined by CHIP in a WT strain expressing Spt20-myc, at *MLP1*-ORF2 and *MLP1*-ORF3 coding regions, in the absence and presence of CR at the indicated times. Data represent the mean and standard deviation of at least three independent experiments.

# Supplementary data Table S1

**Table S1: Primers used in this work**

ChIP (locations are indicated by the distance from the respective ATG initiation codon)

| Primer name       | Sequence (5'-3')             | Position |
|-------------------|------------------------------|----------|
| <b>MLP1</b>       |                              |          |
| MLP1-BOX1 UP      | AATTTCACTGTTTCCGTTAACTGTTG   | -453     |
| MLP1-BOX1 DW      | TCCTACGGTGCTTCCTGCAT         | -313     |
| MLP1-POL II UP    | GCAAAAAGCCTATTTAATGTAAGTCC   | -143     |
| MLP1-POL II DW    | AGGATAAAATCTTGCCGAATG        | 56       |
| MLP1-ORF2 UP      | CGACGGCTTCATTAAGGGTTATA      | 555      |
| MLP1-ORF2 DW      | CCTACCAAGTAGTTCGGCCAAG       | 687      |
| MLP1-ORF3 UP      | TCCTATGTAAGCCAACTTCCATCA     | 1210     |
| MLP1-ORF3 DW      | TCCGTTCAAGTAGTTCACTATTTTCATG | 1359     |
| <b>YLR194C</b>    |                              |          |
| YLR194C-BOX UP    | AATGGCTGGCTTTAGAGTGTCAG      | -254     |
| YLR194C-BOX DW    | TTCAGCTACCTCAGTCGCTAAAAAT    | -123     |
| YLR194C-POL II UP | TGAAAAACGCCTACTTTCTCAGAA     | -130     |
| YLR194C-POL II DW | GTCTTTTTGAGCAGCGGCTAGA       | 60       |
| YLR194C-ORF2 UP   | GAGAGACGTCAAGCGGAATC         | 359      |
| YLR194C-ORF2 DW   | AAGCCGTGTTGTCAGTTGTG         | 520      |
| YLR194C-ORF3 UP   | GGTAGCGTCCGTAATGTCCAA        | 666      |
| YLR194C-ORF3 DW   | TGCAGAACTATGTGGTGGTATACAGA   | 805      |
| <b>YPL088W</b>    |                              |          |
| YPL088W-BOX1 UP   | ACGTTTCTTTTTGTCTGTCTTTT      | -573     |
| YPL088W-BOX1 DW   | CGGGTGATGAATGCCAAGC          | -423     |
| YPL088W-POL II UP | ATTAGGACCCAGAGAACAAGGT       | -91      |
| YPL088W-POL II DW | TCGGTGATATCTTAAGACCTGAGT     | 55       |
| YPL088W-ORF2 UP   | CTGCAGTTCACAGCCGATAA         | 562      |
| YPL088W-ORF2 DW   | CTCGTGCGTTAGGAGACCAT         | 712      |
| YPL088W-ORF3 UP   | TGGGATTGAACACTACAGCAAGA      | 911      |
| YPL088W-ORF3 DW   | CCTTCTATATATCAGTGGGCCCATG    | 1064     |
| <b>VMA8</b>       |                              |          |
| VMA8 UP           | CACAGATGAGCTCCACCGATT        | -321     |
| VMA8 DW           | GGTGAACTGCGGCAATTGTT         | -191     |

RT-qPCR

| Gene           | Primer name | Sequence (5'-3')          |
|----------------|-------------|---------------------------|
| <i>MLP1</i>    | MLP1-UP     | TGAATTATCAAGAATGCACAAAAGC |
|                | MLP1-DW     | TCCTTCCCTTCAAACATTGGTT    |
| <i>YPL088W</i> | YPL088W-UP  | ATGGCTTCCTAACGCACGAG      |
|                | YPL088W-DW  | GTCCTTCGACACCTTTTCCA      |
| <i>CRG1</i>    | YHR209W-UP  | TCGATTTGGAGATATTGAAGTCACA |
|                | YHR209W-DW  | GCATTTGGGTCCGAAGGA        |
| <i>BAG7</i>    | YOR134W-UP  | GGCATCAAAGACCCTACAGAAAAGA |
|                | YOR134W-DW  | TGACTGTCGTTGTTTGTGTTTGG   |
| <i>YLR194C</i> | YLR194C-UP  | GGTAGCGTCCGTAATGTCCAA     |
|                | YLR194C-DW  | CCCGCACCATAAGCTATGTGA     |
| <i>SRL3</i>    | YKR091W-UP  | TTCGTCCAAACATGCCAAAA      |
|                | YKR091W-DW  | GACCAACGTAACGGCGAAA       |
| <i>PRM5</i>    | YIL117C-UP  | AGACATAAGGAAACCCGCAAAAA   |
|                | YIL117C-DW  | ACGATTTACGCTACCATCACTTTCT |
| <i>ACT1</i>    | ACT-UP      | ACGAAAGATTTCAGAGCCCCA     |
|                | ACT-DW      | GCAGATTCCAAACCCAAAAACA    |
